# Supplementary material
Source: publisher figshare collection journal article supplement (https://acs.figshare.com/ndownloader/files/20492856)
Supplement: Supplementary file 1 [file 20492856]

## Supplementary Data

### Catalytic co-pyrolysis of biomass and plastics (polypropylene and polystyrene) using spent FCC catalyst

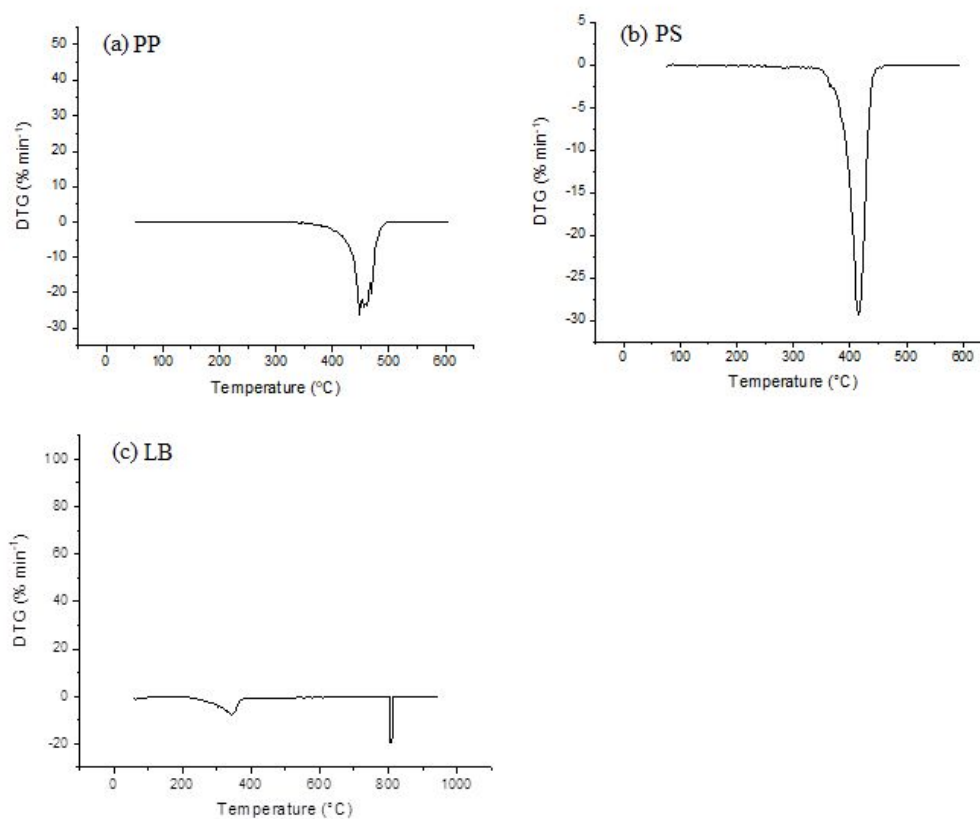

**Fig. S1.** DTG curves for (a). Polypropylene (PP) (b).Polystyrene (PS) and (c). Lignocellulosic biomass (LB)

**Table S1.** Co-pyrolysis studies of biomass with plastics

| S.No | Reference             | Reactor used                           | Operating Temperature | Feed considered                                                                                    | Catalyst used                                                                      | Product yields                                                                                                                                                                | Observations                                                                                                                                                                                                                                                                                                                                  |
|------|-----------------------|----------------------------------------|-----------------------|----------------------------------------------------------------------------------------------------|------------------------------------------------------------------------------------|-------------------------------------------------------------------------------------------------------------------------------------------------------------------------------|-----------------------------------------------------------------------------------------------------------------------------------------------------------------------------------------------------------------------------------------------------------------------------------------------------------------------------------------------|
| 1    | Mullen et al.<br>[22] | Pyroprobe<br>pyrolyzer                 | 650°C                 | Switchgrass and High-density polyethylene (HDPE) – 1 mg (total)<br><br>Biomass/plastic ratio - 1:1 | HZSM-5 (15 mg)                                                                     | Total aromatic yield-GC/MS response (x10 <sup>7</sup> area counts per sample mg)<br><br>–<br><br>Switchgrass – 290<br><br>HDPE - ~183<br><br>Switchgrass and HDPE blend - 341 | In a series of experiments, they observed an increase in aromatics formation and slow catalyst deactivation by coke up to ~2:1 cumulative feed to catalyst loading.<br><br>However, the effect of HDPE addition from 2:1 to 4:1 cumulative feed to catalyst ratio was less beneficial due to excess coke formation inside the catalyst pores. |
| 2    | Zhang et al.<br>[23]  | Continuous<br>Fluidized bed<br>reactor | 600°C                 | Black liquor lignin and polyethylene (PE); 5-200 g/h; Biomass/plastic ratio - 1:1                  | LOSA-1, spent FCC catalyst, $\gamma$ -Al <sub>2</sub> O <sub>3</sub> , sand – 30 g | Petrochemical yield (%C- aromatics and olefins) –<br><br>LOSA-1 - ~44%; spent FCC - ~35%; $\gamma$ -Al <sub>2</sub> O <sub>3</sub> - ~30%; Sand - ~18%;                       | The petrochemical yield (aromatics plus olefins) decreased in the order LOSA-1 > spent FCC catalyst > $\gamma$ -Al <sub>2</sub> O <sub>3</sub> > sand.                                                                                                                                                                                        |

|   |                  |                                 |           |                                              |                                                                   |                                                                                                      |                                                                                                                                                                                                                                                                                                                                          |
|---|------------------|---------------------------------|-----------|----------------------------------------------|-------------------------------------------------------------------|------------------------------------------------------------------------------------------------------|------------------------------------------------------------------------------------------------------------------------------------------------------------------------------------------------------------------------------------------------------------------------------------------------------------------------------------------|
| 3 | Hong et al. [24] | Microscale analytical pyrolyzer | 400-600°C | Cellulose and Polypropylene - 0.8 mg (total) | ZSM-5, Desilicated ZSM-5, Al-SBA-15; Catalyst to feed ratio - 10. | Aromatic yields: 33.5 wt% with Desilicated ZSM-5; 24.62 wt% using parent ZSM-5; 7.38 wt% with Al-SBA | Synergy was observed for both desilicated ZSM-5 and Al-SBA-15. No synergy was observed with parent ZSM-5. Increase in temperature from 400 to 600°C favoured higher aromatic yields. Desilicated ZSM-5 performed better in terms of aromatic yields and deoxygenation reactions.                                                         |
| 4 | Zhao et al. [25] | Microwave oven                  | 200-350°C | Bamboo and Polypropylene -10 g (total)       | HZSM-5                                                            | ~ 30-70 wt%                                                                                          | The optimum conditions for maximum bio-oil yield from jet fuel perspective were identified as 250°C, bamboo/PP ratio of 1:2, and feedstock/catalyst ratio of 2:1. It is also reported that significant deoxygenation reactions occurred at high catalyst loading, and excess PP addition increased the aliphatic content in the bio-oil. |
| 5 | Qi et al. [26]   | Bench-scale fixed bed reactor   | 500-900°C | Microalgae and Polypropylene – 10 g (total)  | HZSM-5                                                            | ~ 30-70 wt. %                                                                                        | <p>i. At constant biomass/PP ratio of 1:1, and sample to catalyst ratio of 1:1, the bio-oil yield was maximum (~70 wt.%) at 500°C and aromatic formation (~77%) was maximum at 800°C.</p> <p>ii. At constant biomass/PP ratio of 1:1, and 800°C, the aromatic yield was 93.29% at feed/catalyst ratio of 1:10.</p>                       |

|    |                         |                                 |       |                                                                                                                                                    |                      |                                                                                   |                                                                                                                                                                                                                                                            |
|----|-------------------------|---------------------------------|-------|----------------------------------------------------------------------------------------------------------------------------------------------------|----------------------|-----------------------------------------------------------------------------------|------------------------------------------------------------------------------------------------------------------------------------------------------------------------------------------------------------------------------------------------------------|
| 6  | Suriapparao et al. [27] | Microwave oven                  | 600°C | Groundnut shell, bagasse, rice husk, prosopis juliflora, mixed saw dust and polypropylene, polystyrene – 20 g (total); Biomass/plastic ratio - 1:1 | None                 | Bio-oil yield from PS blends – 51 to 60 wt.%, and from PP blends – 25 to 41 wt.%. | Co-pyrolysis with PS had more energy yield than PP. PS promoted the aromatic production while PP co-pyrolysis bio-oil had more aliphatic hydrocarbons.                                                                                                     |
| 7  | Chi et al. [28]         | Thermogravimetry analysis (TGA) | 650°C | Cellulose and polypropylene - 0.1 mg (total); Cellulose/PP ratio – 3:1                                                                             | MCM-41 and Al-MCM-41 | Aromatic yield - ~15 wt.% with MCM-41 and ~30 wt.% with Al-MCM-41                 | Al-MCM-41 had a better deoxygenation and cracking effect than MCM-41 in minimizing the oxygenate yields. The yield of furans increased with MCM-41, and the olefin and aromatic yield increased with Al-MCM-41.                                            |
| 8  | Parejo et al. [29]      | Fixed-bed reactor               | 550°C | Grape seeds and polystyrene – 35 g (total)                                                                                                         | None                 | 40-60 wt%                                                                         | The organic phase yield of the bio-oil increased up to 80% with addition of PS. There was an increase in aromatic content and decrease in phenols with addition of PS. PS addition favoured oligomerization, cyclization and hydrodeoxygenation reactions. |
| 9. | Nguyen et al. [30]      | Bubbling fluidized bed reactor  | 500°C | Pine saw dust and waste polystyrene foam – 200 g/hr                                                                                                | None                 | ~50-80 wt%                                                                        | The calorific value of bio-oil increased with increase in PS proportion. The water content and acetic acid concentration decreased with increasing PS ratio.                                                                                               |

|    |                       |                        |           |                                                     |        |                                                                                                     |                                                                                                                                                                                                                                                                                |
|----|-----------------------|------------------------|-----------|-----------------------------------------------------|--------|-----------------------------------------------------------------------------------------------------|--------------------------------------------------------------------------------------------------------------------------------------------------------------------------------------------------------------------------------------------------------------------------------|
| 10 | Shadangi et al. [31]  | Semi-batch reactor     | 500-600°C | Karanja and Niger seeds, polystyrene – 40 g (total) | None   | Bio-oil yield from karanja and PS blends- ~ 46 to 60 wt%; and from Niger and PS blend - 46 to 61wt% | Co-pyrolysis experiments were carried out at biomass/PS ratios of 1:1, 2:1, 4:1, and 8:1. It was reported that the feed ratio of 2:1 was suitable to produce high calorific value bio-oil with low carbon residue.                                                             |
| 11 | Rutkowski et al. [32] | Vertical pyrex reactor | 500°C     | Cellulose and polystyrene – 5 g (total)             | None   | ~ 45-94 wt%                                                                                         | Bio-oil obtained from cellulose-polystyrene mixtures had less acid number, pour point, and density compared to bio-oil obtained from cellulose. Hydrocarbon content increased with decrease of cellulose to polystyrene ratio.                                                 |
| 12 | Hassan et al. [33]    | Quartz tube            | 500-650°C | Torrefied wood (TW) and polystyrene – 3 mg (total)  | HZSM-5 | Aromatic yield varied between ~5 to 75 wt% for samples of pure biomass, plastic and their mixtures. | In catalytic co-pyrolysis of TW with PS, the aromatic yield decreased with increase in temperature. The amount of phenolics dropped from ~53% at 550°C to ~35% at 650°C when HZSM-5 was used as a catalyst. It was reported that the thermal stability of PS was more than TW. |

**Table S2.** Proximate analysis of feed components (%Dry basis)

|                 | <b>Groundnut shell biomass (LB)<sup>a</sup></b> | <b>PP<sup>b</sup></b> | <b>PS<sup>c</sup></b> |
|-----------------|-------------------------------------------------|-----------------------|-----------------------|
| Volatile matter | 77.9                                            | ~100                  | ~99.8                 |
| Fixed carbon    | 19.8                                            | 0                     | 0                     |
| Ash content     | 2.3                                             | 0                     | 0.2                   |

Refs: a. <https://biomasspower.gov.in/biomass-info-asa-fuel-resources.php>

b. D Supramono, Julianto, Haqqyana, H Setiadi, and M Nasikin, Phase separation of bio-oil produced by co-pyrolysis of corncobs and polypropylene, Earth and Environmental Science 93 (2017) 012072

c. Piotr Rutkowski, Andrzej Kubacki, Influence of polystyrene addition to cellulose on chemical structure and properties of bio-oil obtained during pyrolysis, Energy Convers. Manag., 47 (2006), pp. 716-731

**Table S3.**Percentage weight distribution of organic and aqueous phase in the bio-oil

| <b>LB/PP ratio</b> | <b>Thermal co-pyrolysis (TCP)</b> |                      | <b>Catalytic co-pyrolysis (CCP)</b> |                      |
|--------------------|-----------------------------------|----------------------|-------------------------------------|----------------------|
|                    | Organic layer (wt.%)              | Aqueous layer (wt.%) | Organic layer (wt.%)                | Aqueous layer (wt.%) |
| 0.5                | 71                                | 29                   | 72                                  | 28                   |
| 1                  | 66                                | 34                   | 53                                  | 47                   |
| 2                  | 31                                | 69                   | 39                                  | 61                   |
| <b>LB/PS ratio</b> |                                   |                      |                                     |                      |
| 0.5                | 88                                | 12                   | 93                                  | 7                    |
| 1                  | 76                                | 24                   | 75                                  | 25                   |
| 2                  | 63                                | 37                   | 67                                  | 33                   |

**Table S4.** Percentage yields of products in catalytic pyrolysis of LB, PS and PP

| <b>Feed</b>                  | <b>Liquid (wt%)</b> |               | <b>Char (wt%)</b> | <b>Gases (wt%)</b> |
|------------------------------|---------------------|---------------|-------------------|--------------------|
| Groundnut shell biomass (LB) | 30.45               |               | 37.82             | 31.73              |
|                              | Organic phase       | Aqueous phase |                   |                    |
|                              | 19.7%               | 80.3%         |                   |                    |
| Polypropylene (PP)           | 54.72               |               | 0                 | 45.28              |
| Polystyrene (PS)             | 80.02               |               | 5.26              | 14.73              |
